1

# 1 **A cross-scale assessment of productivity-diversity** 2 **relationships**

3 **Running title:** Cross-scale diversity-productivity

4 Dylan Craven<sup>1,2,3,4\*</sup>, Masha T. van der Sande<sup>3,4,5,6,7</sup>, Carsten Meyer<sup>4,8,9</sup>, Katharina Gerstner<sup>4,8</sup>, Joanne M.  
5 Bennett<sup>4,10</sup>, Darren P. Giling<sup>4,8,11</sup>, Jes Hines<sup>4,8</sup>, Helen R. P. Phillips<sup>4,8</sup>, Felix May<sup>4,12</sup>, Katherine H. Bannar-  
6 Martin<sup>4,13</sup>, Jonathan M. Chase<sup>4,14</sup> & Petr Keil<sup>4,14</sup>

7

8 1 Centro de Modelación y Monitoreo de Ecosistemas, Facultad de Ciencias, Universidad Mayor,  
9 Santiago, Chile

10 2 Biodiversity, Macroecology & Biogeography, Faculty of Forest Sciences and Forest Ecology,  
11 University of Göttingen, Büsgenweg 1, 37077 Göttingen, Germany

12 3 Department of Community Ecology, Helmholtz Centre for Environmental Research – UFZ,  
13 06120 Halle (Saale), Germany

14 4 German Centre for Integrative Biodiversity Research (iDiv) Halle-Jena-Leipzig, 04103  
15 Leipzig, Germany

16 5 Department of Biological Sciences, Florida Institute of Technology, Melbourne, FL, USA

17 6 Institute for Biodiversity & Ecosystem Dynamics, University of Amsterdam, Amsterdam, The  
18 Netherlands

19 7 Forest Ecology and Forest Management Group, Wageningen University and Research, Wageningen, the  
20 Netherlands

21 8 Institute of Biology, Leipzig University, Leipzig, Germany

22 9 Institute of Geosciences and Geography, Martin Luther University Halle-Wittenberg, Halle (Saale),  
23 Germany

24 10 Institute of Biology, Martin Luther University Halle-Wittenberg, Halle (Saale), Germany

25 11 Institute of Ecology and Evolution, Friedrich Schiller University Jena, Jena, Germany

26 12 Methodology Centre and Institute of Ecology, Leuphana University Lüneburg, Lüneburg, Germany

27 13 Quantitative Assessment Methods Section, Pacific Biological Station, Fisheries and Oceans Canada,  
28 Nanaimo, BC, Canada

29 14 Department of Computer Sciences, Martin Luther University Halle-Wittenberg, Halle (Saale),  
30 Germany

31

32 \* Correspondence: [dylan.craven@aya.yale.edu](mailto:dylan.craven@aya.yale.edu)

3

### 33 **Acknowledgments**

34 All authors recognize support from the German Centre for Integrative Biodiversity Research (iDiv) Halle-  
35 Jena-Leipzig (DFG-FZT 118). MvdS is supported by the Rubicon research programme with project  
36 number 019.171LW.023, which is financed by the Netherlands Organisation for Scientific Research  
37 (NWO). CM acknowledges funding from the Volkswagen Foundation through a Freigeist Fellowship. We  
38 thank John Kartesz and Misako Nishino for generously providing access to BONAP data. We thank  
39 David Currie and Antonin Machac for initial discussions and Christian Wirth, Katie Barry, Nico  
40 Eisenhauer, Stan Harpole, Miguel Mahecha, and the CAFE discussion group for their suggestions to  
41 improve analyses.

### 42 **Biosketch**

43 The authors are a group of (mostly) early career researchers united by their interest in ecological  
44 synthesis, in areas ranging from macroecology to experimental ecology, ecological theory, and ecological  
45 modeling.

### 46 **Data accessibility statement**

47 All data on species richness, biomass, NPP, covariates, and R code used for the data processing and  
48 analyses are available on Figshare (DOI: 10.6084/m9.figshare.5948155) under a CC-BY license.

49

50

51

52

5

## 53 **Abstract**

54 **Aim:** Biodiversity and ecosystem productivity vary across the globe and considerable effort has been  
55 made to describe their relationships. Biodiversity-ecosystem functioning research has traditionally  
56 focused on how experimentally controlled species richness affects net primary productivity ( $S \rightarrow NPP$ ) at  
57 small spatial grains. In contrast, the influence of productivity on richness ( $NPP \rightarrow S$ ) has been explored at  
58 many grains in naturally assembled communities. Mismatches in spatial scale between approaches have  
59 fostered debate about the strength and direction of biodiversity-productivity relationships. Here we  
60 examine the direction and strength of productivity's influence on diversity ( $NPP \rightarrow S$ ) and of diversity's  
61 influence on productivity ( $S \rightarrow NPP$ ), and how this varies across spatial grains.

62 **Location:** contiguous USA

63 **Time period:** 1999 - 2015

64 **Major taxa studied:** woody species (angiosperms and gymnosperms)

65 **Methods:** Using data from North American forests at grains from local ( $672 \text{ m}^2$ ) to coarse spatial units  
66 (median area =  $35,677 \text{ km}^2$ ), we assess relationships between diversity and productivity using structural  
67 equation and random forest models, while accounting for variation in climate, environmental  
68 heterogeneity, management, and forest age.

69 **Results:** We show that relationships between  $S$  and  $NPP$  strengthen with spatial grain. Within each grain,  
70  $S \rightarrow NPP$  and  $NPP \rightarrow S$  have similar magnitudes, meaning that processes underlying  $S \rightarrow NPP$  and  $NPP \rightarrow S$   
71 either operate simultaneously, or that one of them is real and the other is an artifact. At all spatial grains,  
72  $S$  was one of the weakest predictors of forest productivity, which was largely driven by biomass,  
73 temperature, and forest management and age.

74 **Main conclusions:** We conclude that spatial grain mediates relationships between biodiversity and  
75 productivity in real-world ecosystems and that results supporting predictions from each approach

7

76 (NPP → S and S → NPP) serve as an impetus for future studies testing underlying mechanisms.

77 Productivity-diversity relationships emerge at multiple spatial grains, which should widen the focus of

78 national and global policy and research to larger spatial grains.

79 **Keywords:** spatial grain, biomass, biodiversity-ecosystem function, climate, machine learning, species-  
80 energy

81

82

83

84

85

86

87

88

89

90

91

92

93

94

95

## 96 **Introduction**

97 One of the most prominent questions in ecology is how to describe relationships between biodiversity and  
98 ecosystem-level productivity (Currie, 1991; Rosenzweig, 1995; Mittelbach *et al.*, 2001; Balvanera *et al.*,  
99 2006; Adler *et al.*, 2011; Cardinale *et al.*, 2011, 2012; Hooper *et al.*, 2012; Naeem *et al.*, 2012; Tilman *et*  
100 *al.*, 2014). Two fields of research with different motives have tried to understand causality between these  
101 variables (Loreau *et al.*, 2001). The first examines how biodiversity varies across space as a result of  
102 different levels of productivity created by environmental variation (e.g., temperature, precipitation), and  
103 has resulted in a voluminous literature on the shapes of the patterns and their potential underlying  
104 causality (Connell & Orias, 1964; Currie, 1991; Rosenzweig, 1995; Waide *et al.*, 1999; Mittelbach *et al.*,  
105 2001; Adler *et al.*, 2011; Fraser *et al.*, 2015). The second aims to quantify changes in vital ecosystem  
106 functions such as productivity following anthropogenically-induced changes in diversity (Schulze &  
107 Mooney, 1993; Tilman, 1999; Cardinale *et al.*, 2012; Isbell *et al.*, 2017). As a result of the different  
108 perspectives on the direction of causality, there remains considerable debate and confusion surrounding  
109 the relationship between diversity and productivity (Grace *et al.*, 2016), which is exacerbated by differing  
110 spatial grains at which studies are conducted (Whittaker, 2010; Cardinale *et al.*, 2011).

111 Recently, there has been growing interest in assessing biodiversity ecosystem functioning (BEF)  
112 relationships in real-world, non-experimental ecosystems over large geographic extents, but likely due to  
113 logistical constraints, relationships are typically measured at local spatial grains (Liang *et al.*, 2016; Duffy  
114 *et al.*, 2017; van der Plas, 2019). Results suggest that the positive effect of species richness on  
115 productivity and other ecosystem functions can be as, or more, important than abiotic environmental  
116 drivers' effects on productivity, suggesting that diversity-productivity relationships can be even stronger  
117 in real-world communities than in controlled experiments (Duffy *et al.*, 2017). However, to fully  
118 understand the influence of diversity on productivity, and vice versa, it is critical to recognize that  
119 traditional bivariate analyses may underestimate the strength of these relationships by not accounting for  
120 the effects of spatial grain, as well as those of biomass, shading, macro-climate, and management (Loreau

11

121 *et al.*, 2001; Cardinale *et al.*, 2009; Oberle *et al.*, 2009; Grace *et al.*, 2016).

122 The striking mismatch between the spatial grains of BEF experiments (cm<sup>2</sup> to m<sup>2</sup>; Cardinale *et al.*, 2011),  
123 observational studies of BEF (0.04 to 1.0 ha; Chisholm *et al.*, 2013; Liang *et al.*, 2016), and  
124 macroecological diversity-productivity correlations (m<sup>2</sup> to thousands of km<sup>2</sup>; Mittelbach *et al.*, 2001;  
125 Hawkins *et al.*, 2003; Field *et al.*, 2009; Adler *et al.*, 2011) further obscures comparisons between  
126 perspectives. However, there is a diverse array of theoretical expectations for grain dependency of the  
127 effects of productivity on diversity (NPP → S) and of diversity on productivity (S → NPP), which predict  
128 effects to either strengthen or weaken as the spatial grain increases (Table 1; Gonzalez *et al.*, 2020). For  
129 example, spatial turnover of species that are functionally equivalent within the regional grain can offset  
130 low species richness at local grains, resulting in a strengthening of S → NPP with increasing spatial grain.  
131 The effects of NPP → S are also hypothesized to increase with spatial grain, because higher NPP is  
132 associated with greater heterogeneity at larger spatial grains, which enhances coexistence of more species  
133 at the regional grain. Moreover, other components of a community, such as biomass, can mediate  
134 relationships between productivity and diversity via their effects on competitive dominance (Grace *et al.*,  
135 2016). These theoretical expectations have been supported by observational data for the effects of  
136 productivity on diversity (Mittelbach *et al.*, 2001; Chase & Leibold, 2002; Belmaker & Jetz, 2011). In the  
137 case of BEF relationships (i.e. S → NPP), there is also empirical and theoretical support for grain  
138 dependence, which comes from a restricted range of small spatial grains (Luo *et al.*; Chalcraft, 2013; Hao  
139 *et al.*, 2018).

140

141

142

143

144

13

145 **Table. 1** Overview of hypotheses predicting grain dependence of relationships between net primary  
 146 productivity (NPP) and species richness (S).

| No. | Direction           | Mechanism of grain dependence                                                                                                                                                                                                                                  | Weakens or strengthens towards coarse grain?                               | Reference                                                          |
|-----|---------------------|----------------------------------------------------------------------------------------------------------------------------------------------------------------------------------------------------------------------------------------------------------------|----------------------------------------------------------------------------|--------------------------------------------------------------------|
| I   | NPP → S and S → NPP | Spatially asynchronous demographic stochasticity impacts small populations (or small grains) and averages out over large grains.                                                                                                                               | Both NPP → S and S → NPP strengthen towards coarse grains                  | (Lande <i>et al.</i> , 2003)                                       |
| II  | NPP → S             | At larger grains, higher NPP is associated with increased heterogeneity and/or dissimilarity of local patches, allowing for greater regional coexistence.                                                                                                      | NPP → S strengthens towards coarse grains                                  | (Abrams, 1988; Wright <i>et al.</i> , 1993; Chase & Leibold, 2002) |
| III | NPP → S             | A statistical interaction between NPP and grain in their effect on S emerges as a consequence of increasing occupancy with NPP.                                                                                                                                | NPP → S weakens towards coarse grains                                      | (Storch <i>et al.</i> , 2005)                                      |
| IV  | NPP → S             | At very large grains (thousands of km <sup>2</sup> and larger), high productivity increases occupancy and population size, thus increasing the probability of reproductive isolation and speciation                                                            | NPP → S strengthens towards coarse grains                                  | (Jetz & Fine, 2012)                                                |
| V   | S → NPP             | Stochastic sampling effects dominate at small grains, resource partitioning at larger grains ('spatial insurance'), and their relative magnitude determines the grain dependency.                                                                              | Both strengthening or weakening possible                                   | (Loreau <i>et al.</i> , 2003; Cardinale <i>et al.</i> , 2004)      |
| VI  | S → NPP             | Functionally redundant species at intermediate or coarse grains can compensate for low richness at local grains.                                                                                                                                               | S → NPP strengthens towards coarse grains                                  | (Srivastava & Vellend, 2005)                                       |
| VII | S → NPP             | With incomplete compositional turn-over, proportional changes in larger-grain richness are always less than proportional changes in smaller-grain richness such that the explanatory power of richness on changes in functioning decreases with spatial scale. | S → NPP strengthens towards coarse grains until species richness saturates | (Thompson <i>et al.</i> , 2018)                                    |

147

148 Here, we aim to address the dual nature by which productivity influences diversity (NPP → S) and  
 149 diversity influences productivity (S → NPP) across spatial grains by combining structural equation models  
 150 (SEM) and random forest models (RFs) to explicitly account for the bidirectionality of NPP → S and  
 151 S → NPP. Using SEM, we propose and test hypothesis-based models (Fig. S1) that estimate the direction  
 152 and strength of NPP → S and S → NPP. Next, we use RFs, an assumption-free machine learning approach  
 153 (Breiman, 2001; Hastie *et al.*, 2009), to quantify the relative importance of predictors of species richness  
 154 and productivity. We examine both hypothesized directions of the relationship, along with a number of  
 155 important covariates that influence both diversity and productivity, such as biomass, precipitation,  
 156 temperature, and forest age, using a comprehensive observational dataset of North American forests at

15

157 fine (area = 672 m<sup>2</sup>;  $n = 46,211$  plots), medium (median area = 1,386 km<sup>2</sup>;  $n = 1,956$  spatial units), and  
158 coarse spatial grains (median area = 35,677 km<sup>2</sup>; 98 spatial units). We specifically ask whether the  
159 influence of productivity on diversity (NPP → S) was stronger or weaker than the influence of diversity on  
160 productivity (S → NPP), and how these relationships manifest across grains in real-world ecosystems.

## 161 **Methods**

### 162 **Data**

163 **Geographic extent and grain.** We conducted analyses across the contiguous USA at three spatial grains  
164 (Fig. 1): (1) fine grain (46,211 plots, 672 m<sup>2</sup> or 0.000672 km<sup>2</sup> each), (2) intermediate grain (1,956 units,  
165 median 1,386 km<sup>2</sup>) created by aggregating US counties to larger units based on the forested area within  
166 them (see ‘spatial aggregation algorithm’ below), and (3) coarse grain (95 units, median 35,677 km<sup>2</sup>)  
167 created by further aggregating the intermediate grain units. We restricted our analyses to forested areas to  
168 make comparisons within and among spatial grains in similar ecosystems. For the intermediate and coarse  
169 grains, we defined an area as forested if it fell into a 1 km<sup>2</sup> pixel with non-zero forest biomass following  
170 Blackard *et al.* (2008).



17

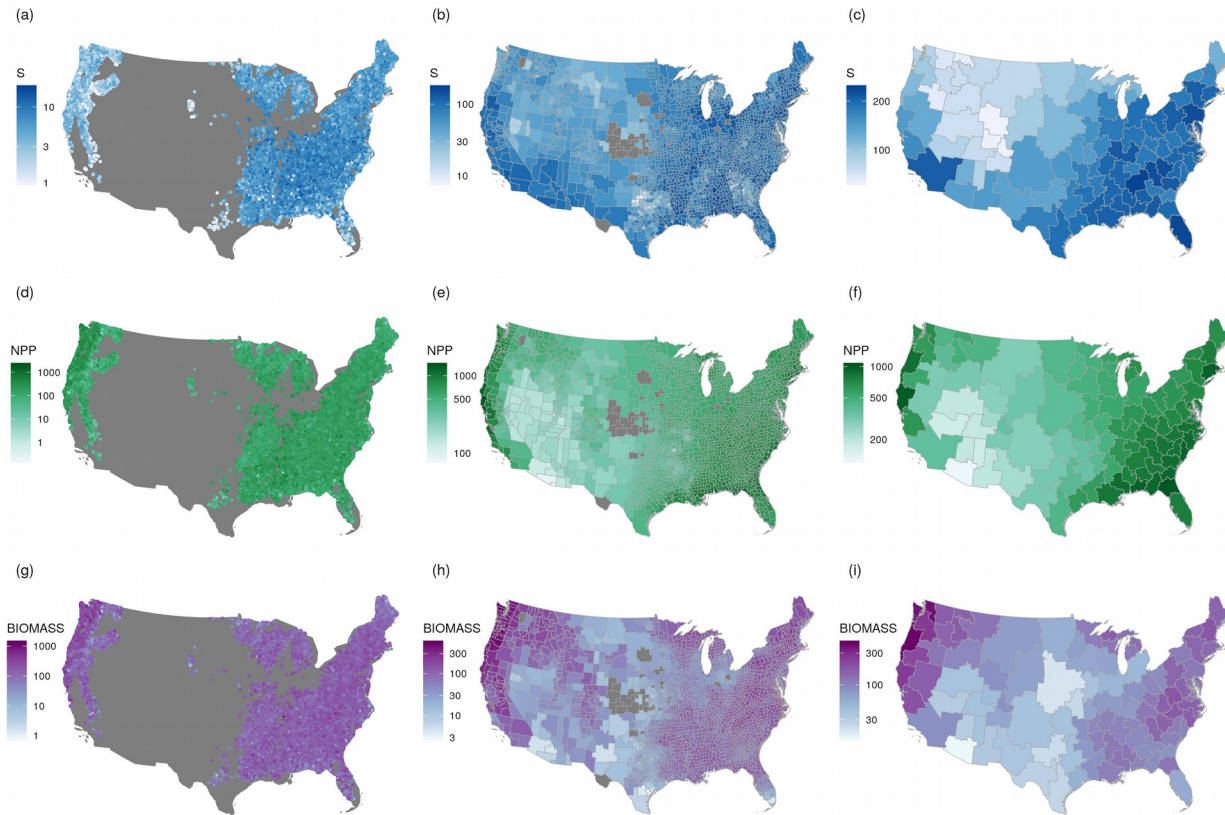

171

172 **Fig.1.** Maps of species richness (S), MODIS-derived net primary productivity (NPP) [gC/m<sup>2</sup>/year], and  
173 biomass [Mg/ha] of forests at three spatial grains across the contiguous USA. The values in all plots are  
174 on log<sub>10</sub> scale.

175 **Species richness (S).** For all spatial grains, we estimated diversity as species richness (S) because it is the  
176 most commonly used and best understood metric of biodiversity, although other measures of diversity  
177 may be better predictors of net primary productivity (Paquette & Messier, 2011; Cadotte, 2015; Venail *et*  
178 *al.*, 2015). We extracted S at the fine spatial grain from the Forest Inventory and Analysis National  
179 Program (FIA) database v. 1.7.0 (USDA Forest Service, 2017). We restricted our analysis to plots on  
180 forested land that were sampled using the national FIA design (plot design code 1)(Burrill *et al.*, 2018).  
181 All plots were surveyed between 1998 and 2016, each consisting of four circular 168 m<sup>2</sup> sub-plots with a  
182 total area of 672 m<sup>2</sup> ha in which all individuals larger than 12.7 cm diameter at 1.3 m were recorded and  
183 identified to species level. For each plot we pooled data from all subplots to estimate S. In total, our final  
184 dataset included 344 woody species and 93,771 plots. We estimated S at the intermediate and coarse  
185 spatial grains by counting the number of unique woody species in each spatial unit using data for the

19

186 contiguous USA provided in The Biota of North America Program's (BONAP) North American Plant  
187 Atlas (Kartesz, 2015).

188 **Taxonomic harmonization of species names.** We cleaned scientific names from the FIA and BONAP  
189 datasets and harmonized them to accepted species based on The Plant List (2013) and the Taxonomic  
190 Name Resolution Service (2018), following the protocol described in Meyer et al. (2016). We included  
191 hybrid forms, but excluded any names that could not be resolved to the species level.

192 **Filtering of species occurrences.** We restricted our analyses to tree species that likely occur in forests.  
193 At the fine spatial grain, we included native and alien species. At the intermediate and coarse spatial  
194 grains, however, we excluded alien species because we could not be certain if they occurred in forests as  
195 many are cultivated, particularly in urban ecosystems (Kowarik, 2008; Pearse *et al.*, 2018). We therefore  
196 filtered the BONAP data to native species classified as 'trees' in BONAP's taxonomic query database  
197 (Kartesz, 2015). We further filtered out 70 county-level occurrences of 5 non-woody species from the  
198 BONAP dataset. Species woodiness was inferred from woodiness data (Zanne *et al.*, 2013) and species  
199 lists of trees, shrubs and subshrubs (USDA NRCS, 2018), except for 37 species without such data for  
200 which we instead inferred woodiness from online searches or assumed resemblance among congeneric  
201 species. We also filtered out 8 FIA plot-level species occurrences and 1,595 BONAP county-level species  
202 occurrences that we deemed unlikely to be forest occurrences, as inferred from independent species  
203 occurrences within forested pixels recorded in FIA plots and Global Biodiversity Information Facility  
204 (GBIF) point-occurrence records (Downloaded via <https://www.gbif.org/> on 26th September 2016;  
205 doi:10.15468/dl.mka2y5; Supplementary Note 1). To make species richness data internally consistent  
206 across the different spatial grains, we added a further 6,593 quality-vetted county-level forest occurrences  
207 of woody species from FIA plot records to the 282,991 occurrences in the taxonomically harmonized  
208 BONAP dataset.

209 **Net primary productivity (NPP).** At all spatial grains, we calculated NPP using MODIS-derived

21

210 estimates, which we further supplemented with plot-derived estimates at the fine spatial grain. Briefly, we  
211 calculated NPP using the MODIS-derived MOD17 A3 product (Zhao *et al.*, 2005; Zhao & Running,  
212 2010), which gives annual values of NPP as  $\text{gC m}^{-2} \text{yr}^{-1}$  in 30 arc-sec pixels (roughly  $1 \text{ km}^2$  around the  
213 equator). Here, NPP is defined as the annual sum of daily net photosynthesis minus the cost of growth  
214 and maintenance of living cells in permanent woody tissue. We averaged the annual values from 2000 to  
215 2015 for each pixel, and then averaged these across the intermediate and coarse grains. We use MODIS-  
216 derived NPP in the analyses presented in the main text to ensure comparability across spatial grains.

217 At the fine spatial grain, we also estimated NPP using plot-derived data. For a large subset of plots in the  
218 FIA database that have been measured at least twice between 1999 and 2015 ( $n = 46,211$ , on average  
219 plots re-measured every 5.8 years), we calculated net annual net aboveground C change ( $\text{gC m}^{-2} \text{y}^{-1}$ ). This  
220 was measured as the net change in aboveground tree C between two measurements as the sum of  
221 aboveground C growth of living trees, ingrowth by recruitment, and loss from tree mortality (NPP<sub>mort</sub>;  
222 Chen & Luo, 2015). Tree-level carbon was estimated by multiplying tree-level biomass (see below) by  
223 0.48, but we recognize that gymnosperms may have higher carbon content than that of angiosperms  
224 (Thomas & Martin, 2012). For plots with more than two inventories, tree productivity was calculated for  
225 each period and then averaged. NPP<sub>mort</sub> was weakly correlated with MODIS-derived NPP at the fine  
226 spatial grain ( $r = 0.19$ ), suggesting that it may capture different processes. Therefore, we provide the  
227 analyses using the plot-derived NPP at the fine spatial grain in the Supplementary Information.  
228 Importantly, results concerning the strength of the S-NPP relationship were qualitatively similar for both  
229 NPP measures.

230 **Biomass (BIOMASS).** At all spatial grains, we derived biomass values using a map of aboveground  
231 forest biomass of the USA, which is derived by modeling FIA plot biomass as a function of geospatial  
232 predictor variables (Blackard *et al.*, 2008). This data layer had a grain of  $250 \times 250 \text{ m}^2$ , therefore, the  
233 average within each of the intermediate- and coarse-grain spatial units was taken.

23

234 For analyses using plot-derived NPP, we estimated tree-level biomass at the fine spatial grain using  
235 generalized biomass equations developed for North American tree species (Chojnacky *et al.*, 2013). For  
236 each FIA plot we calculated aboveground biomass ( $\text{Mg ha}^{-1}$ ) as the sum of individual biomass of living  
237 trees per hectare.

238 **Number of trees (N).** At the fine scale, we estimated the number of trees directly from each FIA plot. For  
239 the intermediate and coarse spatial grains, we estimated the number of trees using a global map of tree  
240 density (Crowther *et al.*, 2015). As the grain of the data layer was  $1 \times 1 \text{ km}^2$ , average tree density was  
241 calculated within each spatial unit at the intermediate and coarse spatial grains.

242 **Forest age (AGE) and management (MANAGED).** For each plot in the fine-scale dataset, we  
243 extracted forest age and management history from the FIA data set. Forest age is estimated using  
244 dendrochronological records (Burrill *et al.*, 2018). Management regime was a binary variable that  
245 indicated whether any forest management activity, e.g. harvest, thinning, tree planting, had been observed  
246 in any inventory or not.

247 At the intermediate and coarse grain, forest age was calculated as the average forest age from NASA  
248 NACP  $1 \text{ km}^2$  resolution layer (Pan *et al.*, 2012). Management regime at the intermediate and coarse grains  
249 was calculated as the proportion of managed FIA plots within all FIA plots that were within each spatial  
250 unit.

251 **Climatic variables.** For all grains, we used WorldClim (Hijmans *et al.*, 2005) bioclimatic variables at 30  
252 sec resolution. Many of the WorldClim variables are strongly collinear with one another, or with other  
253 variables in the analysis (Table S1, Fig. S1). Thus, only three variables that captured different aspects of  
254 the climate were selected; mean annual temperature (BIO1; ANN.TEMP), mean precipitation (BIO12;  
255 ANN.PREC), and temperature seasonality (BIO4; TEMP.SEAS). At the fine scale, for each FIA plot we  
256 extracted the values of the 30 sec pixel in which the plot was found. For the intermediate and coarse  
257 grains, we averaged the values across all pixels within each spatial unit.

25

258 **Elevation range (ELEV.RANGE).** We used elevation range as a proxy for topographic and habitat  
259 heterogeneity, a variable that has been shown to be a good predictor of species richness (Stein *et al.*,  
260 2014). The USGS SRTM1 dataset (USGS, 2009) with 1 sec (approx. 30 x 30 m<sup>2</sup>) resolution was used for  
261 all spatial grains. At the fine-scale, we calculated a 250 m diameter buffer around each FIA plot and  
262 calculated the elevation range using all 1 sec SRTM pixels within the buffer. At the intermediate and  
263 coarse scale, elevation range was calculated as the difference between the minimum and maximum  
264 elevation points within each spatial unit.

265 **Species pools (S.POOL).** We calculated regional species pools for each spatial grain as probabilistic  
266 dispersal pools (Karger *et al.*, 2016). For each intermediate-grain spatial unit and each species in our data  
267 set, we first estimated the species' probability of being part of the unit's species pool as the joint  
268 probabilities that dispersal might happen between that unit and any of the species' intermediate-grain  
269 occurrences within the contiguous US. Due to insufficient data on species' dispersal abilities, we assumed  
270 that dispersal probability between focal units and species' occurrences would decay with great-circle  
271 distance between the respective regions' centroids. We explored five alternative exponential distance-  
272 decay functions, with scaling coefficients  $P$  that determined the probability of a species occurring in  
273 neighboring units would disperse to the focal unit of 0.975, 0.95, 0.90, 0.80, and 0.60. We chose the  
274 function with  $P = 0.8$ , which exhibited the strongest correlation between species pool and species richness  
275 at all spatial grains (Fig. S2). Finally, we calculated species pools for each spatial unit as the sum of all  
276 species' individual probabilities of dispersal from any of their respective occurrences. For each coarse-  
277 grain unit, we summed the species' joint probabilities of dispersal between any of their intermediate-grain  
278 occurrences and any of the intermediate-grain units nested within the coarse unit. For fine-grain units, we  
279 assumed that their species pools would equal those of the intermediate-grain spatial units in which they  
280 were nested.

281 All of the variables used in our analyses are listed and summarized in Table S1 and visualized in Fig. S1.

27

282 **Spatial aggregation algorithm.** Because US counties vary dramatically in their area (Fig. S3), from Falls  
283 Church (VA) being as small as 5.1 km<sup>2</sup>, to San Bernardino (CA) with 52,109 km<sup>2</sup>, it is difficult to assign  
284 one categorical grain size to county-level data. Thus, we aggregated county data for species richness to  
285 create new spatial units, with the goal to minimize variation in forested area ( $A$ ) between spatial units. We  
286 achieved this using a greedy algorithm which worked as follows: (1) Calculate variance ( $V_1$ ) of forested  
287 area ( $A$ ) across all counties. (2) Randomly select a focal county with a probability proportional to  $1/\sqrt{A}$ ,  
288 which will most likely select counties with small  $A$ . (3) Randomly choose a county adjacent to the focal  
289 county and merge it with the focal county. (4) Update the variance ( $V_2$ ) of forested area across all spatial  
290 units in the USA and compare it to the original variance  $V_1$ . If the  $V_2 < V_1$ , the algorithm accepts the  
291 merged unit and returns to step one. If the variance does not decrease, the algorithm repeats step 3 until  
292  $V_2 < V_1$ , with the maximum number of attempts of 1,000. If the variance still does not decrease even after  
293 1,000 attempts, the algorithm rejects the merge, and returns to step one. The algorithm started with 3,107  
294 counties, and we first terminated it when 1,956 merged spatial units were created. We classified these  
295 spatial units as the intermediate spatial grain (Fig. 1). We then allowed the algorithm to continue until it  
296 reached 98 merged spatial units, which we classified as the coarse spatial grain (Fig. 1). Although the  
297 algorithm substantially reduced variation in area within both spatial grains (Fig. S3), it did not eliminate  
298 the variation entirely. For this reason, we used area as a covariate in the statistical analyses at the  
299 intermediate and coarse spatial grains.

300

301 **Stratified random sampling.** Large areas of the contiguous US are environmentally homogeneous, while  
302 other parts are environmentally unique and small. We employed stratified random sampling (Cochran,  
303 1977) for the fine and intermediate spatial grains in order to (1) enhance environmental representativeness  
304 of the data, (2) prevent excessive statistical leverage of the large number of data points from  
305 homogeneous areas and (3) reduce spatial pseudoreplication (autocorrelation) by increasing the  
306 geographic distance between data points. We first identified 11 strata at the fine and intermediate grains  
307 respectively, using multivariate regression trees with S, NPP and biomass as response variables and all

29

308 covariates as predictors (Fig. 1). We then took a random and proportionally sized sample of spatial units  
309 from each strata (fine grain, N = 1,000; intermediate grain, N = 500). We did not use stratified random  
310 sampling at the coarse spatial grain because of the small number of spatial units (N = 98). The spatial  
311 locations of the stratified samples are in Fig. S4. All of the analyses presented here, as well as our main  
312 conclusions, are based on these stratified sub-samples of the data.

313 **Data transformation and standardization.** Prior to analysis, species richness, biomass, N, NPP, and  
314 area were natural-log transformed to meet normality assumptions of the standardised major-axis  
315 regressions and SEMs.

## 316 **Data Analyses**

317 We quantified simple bivariate relationships between diversity and productivity for each spatial grain  
318 using standardised major-axis regression with the 'sma' function in the R package 'smatr' (Warton *et al.*,  
319 2012). We then used two complementary statistical approaches to assess the impacts of diversity and  
320 productivity and vice versa while simultaneously accounting for covariates that influence both.

321 First, we fitted structural equation models (SEMs), which allow the assessment of indirect effects  
322 including feedback loops, address causality, and take into account potential collinearity among covariates  
323 (Grace *et al.*, 2010; Shipley, 2016). The paths in our candidate SEMs were based on previous evidence of  
324 causal links between S, biomass, and NPP (Fig. 2; Grace *et al.*, 2016). Second, to better understand the  
325 relative importance of each variable in explaining variation in the response variables within models, we  
326 fitted random forest models (RFs) (Hastie *et al.*, 2009). The results from SEMs provide insight into  
327 differences among models (i.e. between the two causal pathways per spatial grain, and among spatial  
328 grains), while results from RFs provide additional insights into the relative importance of different  
329 predictors variables within models.



31

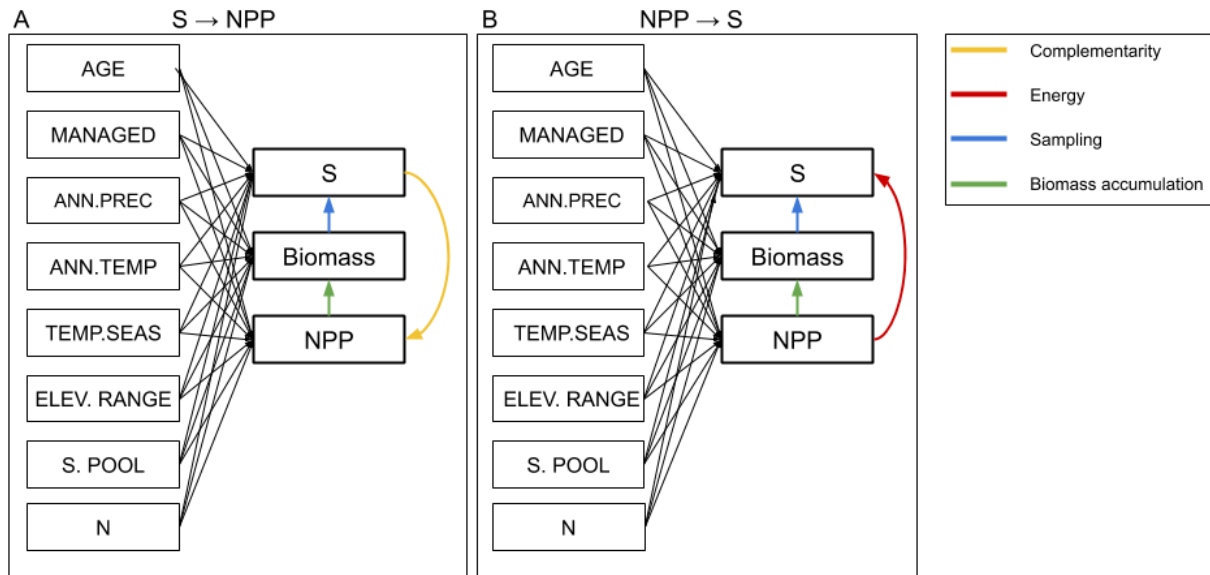

330  
 331 **Fig. 2.** Hypothetical causal models for structural equation models (SEM) testing the relative importance  
 332 of species richness (S) on net primary productivity (NPP) ('S → NPP'; A) and NPP on S ('NPP → S'; B) in  
 333 forests across the contiguous USA at three spatial grains. Paths in color represent possible ecological  
 334 mechanisms influencing the direction of the relationship; yellow paths represent complementarity effects,  
 335 red paths represent 'species-energy' relationships, blue paths represent sampling (or niche) effects and  
 336 green paths represent biomass accumulation. Black paths are relationships of additional covariates with S,  
 337 NPP, and BIOMASS and are not hypothesized to occur in a particular direction. AGE is forest age,  
 338 MANAGED is forest management, ANN.PREC is mean annual precipitation, ANN.TEMP is mean  
 339 annual temperature, TEMP.SEAS is temperature seasonality, ELEV.RANGE is elevation range, S.POOL  
 340 is the regional species pool, and N is the number of individuals. At the intermediate and coarse spatial  
 341 grains, we added AREA to the SEMs to account for differences in the area of spatial units. S, BIOMASS,  
 342 NPP, and AREA were natural log transformed prior to analysis.

343  
 344 **Structural Equation Modelling (SEM).** To test the relative importance of S on NPP ('S → NPP') and  
 345 NPP on S ('NPP → S') we fitted two SEMs per spatial grain. For each SEM, we started with a 'saturated'  
 346 model, which included the relationships between S, NPP, and biomass, and relationships of all additional  
 347 covariates on S, NPP, and biomass (except for area at the fine spatial grain) (Fig. 2). The S → NPP model  
 348 evaluated how S directly affects NPP and how NPP indirectly affects S via biomass and, therefore,  
 349 included a feedback loop. The NPP → S model tested the direct effect of NPP on richness and, unlike the  
 350 S → NPP model, did not include a feedback loop. This way, we tested the direct effect of S on NPP  
 351 (S → NPP model), the direct effect of NPP on S (NPP → S), and the indirect effect of NPP on S (included  
 352 in both models).

353 Model fit can only be tested on unsaturated models, i.e. those that have at least one missing path.



33

354 Therefore, we removed the path with the lowest standardized path coefficient from the model. As SEMs  
355 had an equal number of paths, we could compare model fit across all models within each spatial grain  
356 using their unadjusted  $R^2$  values. After excluding the additional paths, path coefficients of S, NPP, and  
357 biomass remained qualitatively the same, and model fit to the data were still accepted (Chi-square test;  
358  $P > 0.05$ ). This indicates that the models are identifiable and their results are robust. Therefore, we did not  
359 further reduce the model, and models maintained the same number of paths within each scale. Because  
360 models at the fine spatial grain including the number of individuals (N) did not fit the data well ( $P <$   
361  $0.05$ ), we excluded this variable. Models at the intermediate and coarse spatial grains including N fit the  
362 data well ( $P > 0.05$ ), but we present models without N for consistency with the fine spatial grain and  
363 because the sampling effects captured by N are also captured by area.

364 To assess the differences among scales in the relationships between S, NPP and biomass for each model,  
365 we compared the standardized regression coefficients using their 95% confidence intervals. All SEMs  
366 were fitted using the ‘sem’ function of the ‘lavaan’ package in R (Rosseel, 2012).

367 **Random forest models (RFs).** To assess the relative importance of each variable in predicting the  
368 response variables within models, we used random forest models (RFs) (Breiman, 2001; Liaw & Wiener,  
369 2002; Hastie *et al.*, 2009). We used the ‘randomForest’ function in the R package ‘randomForest’, with  
370 all RF models produced using the default settings: 500 trees, one third of predictors sampled in each tree,  
371 sampling with replacement of the entire dataset, and terminal node size of 5.

372 At each of the three spatial grains we fitted two RFs, one with S as a response variable and the other with  
373 NPP as a response variable. All predictors that were used in the SEMs were used in the RF models  
374 (including biomass). To quantify the relative importance of each predictor, we calculated the mean  
375 decrease of squared error across all 500 trees using the ‘importance’ function. The importance values  
376 were then scaled between 0 and 1, with 1 being the most important predictor. Using the function  
377 ‘partialPlot’, we extracted the partial responses of S and NPP to visualize the relationship between the

35

378 two variables after accounting for all other covariates.

379 **Non-linear responses and spatial autocorrelation.** SEMs offer the advantage of modelling complex,  
380 causal relationships (Grace *et al.*, 2010; Shipley, 2016), but they can be difficult to fit to data with non-  
381 linear responses or spatial pseudoreplication. While it is possible to model non-linearity in SEMs, e.g.  
382 using polynomials (Grace *et al.*, 2010; Shipley, 2016), this often comes at the cost of interpretability. A  
383 similar problem applies when it comes to another prevalent problem of observational geographic data:  
384 spatial autocorrelation, which statistical models have so far addressed by modelling it either in residuals,  
385 or in the response (Dormann *et al.*, 2007). However, because of the causal loop in the SEMs (Fig. 2), the  
386 key response variables are also predictors, which prevented us from estimating spatial autocorrelation. In  
387 our analyses, we account for these issues in the following manner: (1) In the SEM analyses, we keep the  
388 relationships linear, given the approximately linear pairwise relationships between the raw NPP, S and  
389 biomass data (Figs. S5-7). (2) In the SEM analyses we do not directly model spatial autocorrelation. (3)  
390 We address spatial autocorrelation in the random forest analysis by allowing the algorithm to model  
391 smooth geographic trends in the response (by including the X and Y spatial coordinates as predictors),  
392 and we measure spatial autocorrelation in the response and in residuals. (4) We allow the random forest  
393 analysis to detect non-linear responses.

394 **Reproducibility.** All data on species richness, biomass, NPP, covariates, and R code used for the data  
395 processing and analyses are available on Figshare (DOI: 10.6084/m9.figshare.5948155) under a CC-BY  
396 license.

## 397 **Results**

398 Spatial patterns in productivity (NPP) and richness (S) emerged at coarser spatial grains, with higher S  
399 and NPP usually observed in the eastern USA than in the western USA (Fig. 1). Biomass, a time-  
400 integrated measure of NPP that also influences diversity, also exhibited similar patterns (Fig. 1). Bivariate  
401 relationships between S and NPP exhibited scale dependence (Fig. 3). While not significantly correlated

37

402 at the fine spatial grain (standardised major axis regression:  $R^2 = 0.00$ ,  $P = 0.73$ ), S and NPP were  
403 significantly correlated at the intermediate (standardised major axis regression:  $R^2 = 0.15$ ,  $P < 0.001$ ) and  
404 coarse spatial grains (standardised major axis regression:  $R^2 = 0.35$ ,  $P < 0.001$ ). The slope of S-NPP  
405 increased from 0.86 (95% confidence intervals: 0.80, 0.94) at the intermediate spatial grain to 1.23 (95%  
406 confidence intervals: 1.05, 1.45) at the coarse spatial grain. Similar patterns were observed when using  
407 plot-derived estimates of NPP at the fine spatial grain (Fig. S8).

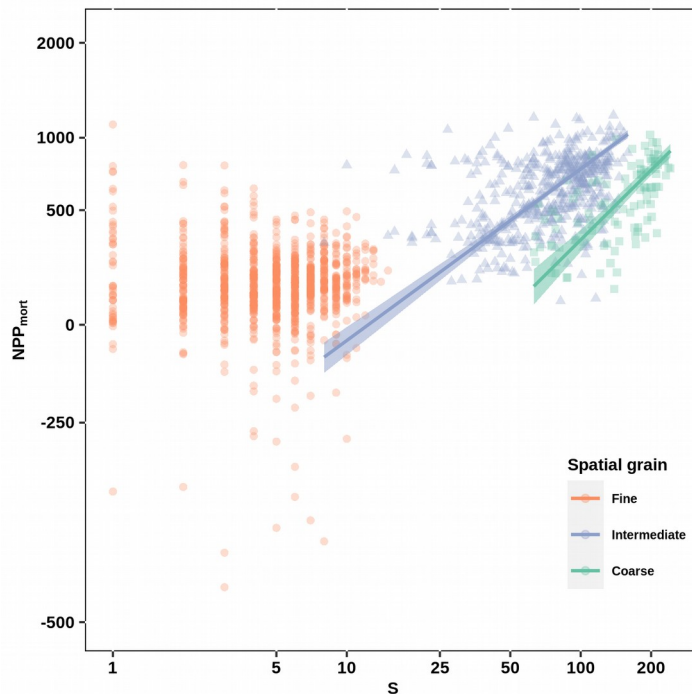

408

409 **Fig. 3.** Bivariate relationships between observed species richness (S) and productivity (NPP) of forests at  
410 three spatial grains across the contiguous USA. Solid lines are standardised major-axis regressions fitted  
411 at each spatial grain and shaded areas are 95% confidence intervals; only regressions with statistically  
412 significant slopes ( $P < 0.05$ ) were visualised. NPP is MODIS-derived at all spatial grains. Note that axes  
413 are on the natural log scale. Analyses were performed using stratified random samples of 1000, 500 and  
414 98 spatial units at the fine, intermediate and coarse spatial grains, respectively.

415

416 **Structural Equation Models (SEM).** We examined relationships between species richness and net  
417 primary productivity (NPP) across spatial grains using two SEMs for each spatial grain: the first  
418 ( $S \rightarrow NPP$ ) testing the direct effect of S on NPP and the indirect effect of NPP on S (via biomass), and the

39

419 second (NPP → S) testing both the direct and indirect effects of NPP on S (Fig. 4). In both SEMs,  
 420 environmental variables (e.g., mean annual precipitation, mean annual temperature, temperature  
 421 seasonality, and elevation range), size of the species pool, forest age, and management were used to  
 422 explain variation in S, biomass, and NPP. At the intermediate and coarse grains, we also included area (of  
 423 each spatial unit) to account for variation in species richness due to sampling effects.

424

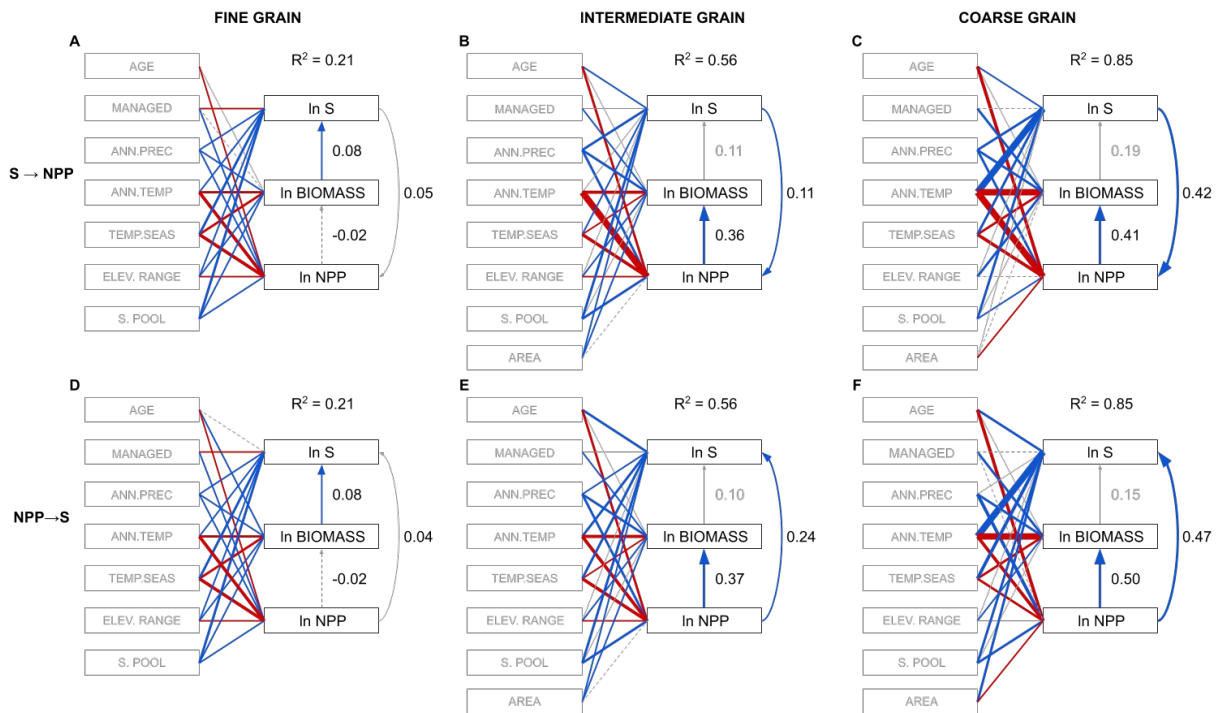

425

426 **Fig. 4.** Structural equation models (SEM) testing the influence of diversity (S) on productivity (NPP) ('S  
 427 → NPP'; A, B, C) and that of NPP on S ('NPP → S'; D, E, F), once controlling for environmental  
 428 variables (e.g., mean annual precipitation, mean annual temperature, temperature seasonality, and  
 429 elevation range), size of the species pool, forest age, and management, in forests across the contiguous  
 430 USA at three spatial grains. All models fit the data well at all spatial grains (P-value of the Chi-square test  
 431 > 0.1; Table S1). Boxes represent measured variables and arrows represent relationships among variables.  
 432 Solid blue and red arrows represent significant (P < 0.05) positive and negative standardized path  
 433 coefficients, respectively, and their width is scaled by the corresponding standardized path  
 434 coefficient. Solid and dashed gray arrows represent non-significant (P > 0.05) positive and negative path  
 435 coefficients, respectively. R<sup>2</sup> is the average of R<sup>2</sup> values for S, BIOMASS, and NPP. NPP is MODIS-  
 436 derived at all spatial grains. AGE is forest age, MANAGED is forest management, ANN.PREC is mean  
 437 annual precipitation, ANN.TEMP is mean annual temperature, TEMP.SEAS is temperature seasonality,  
 438 ELEV.RANGE is elevation range, S.POOL is the regional species pool, and AREA is area. S,

41

439 BIOMASS, NPP, and AREA were natural log transformed prior to analysis.

440

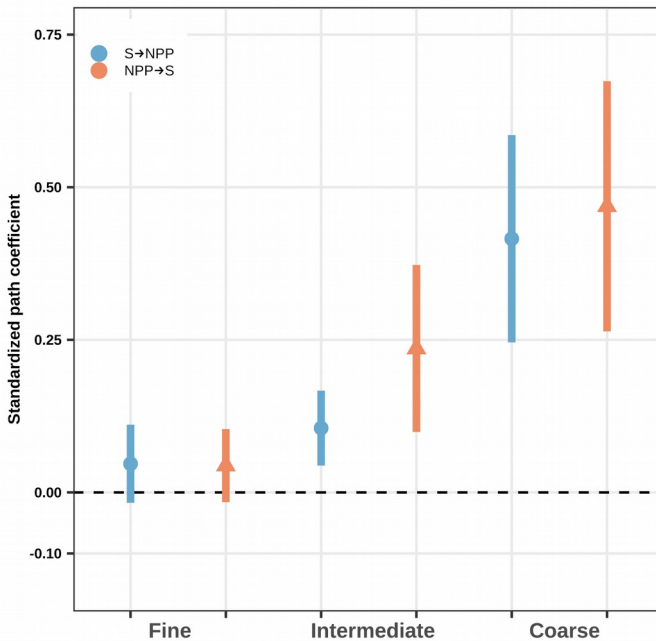

441

442 **Fig. 5.** Direct effects of diversity on productivity ( $S \rightarrow NPP$ ) and productivity on diversity ( $NPP \rightarrow S$ )  
443 estimated with structural equation models (SEM) in forests across the contiguous USA at three spatial  
444 grains. Points are standardized path coefficients and solid lines are 95% confidence intervals.

445

446 Both models fit the data well for all spatial grains (P-value of the Chi-square test  $> 0.1$ ; Table S2). At  
447 each spatial grain, both SEMs had similar  $R^2$  values averaged over S, biomass and NPP, indicating a  
448 similar fit of the model to the data.  $R^2$  values for both SEMs increased with spatial grain, from 0.21 at the  
449 fine grain, to 0.56 at the intermediate grain and 0.85 at the coarse grain. Generally, the strength of effects  
450 of  $S \rightarrow NPP$  and  $NPP \rightarrow S$  were similar within each spatial grain, but both increased in strength with  
451 increasing spatial grain (Figs. 4 & 5). At the fine spatial grain, we found a weak direct effect of  $S \rightarrow NPP$   
452 (Fig. 4A) and  $NPP \rightarrow S$  (Fig. 4D), and effectively a null indirect effect of NPP on S via biomass  
453 (standardized path coefficient of indirect effect = -0.002; Fig. 4A). At the intermediate spatial grain, we  
454 found a similarly strong direct effect of S on NPP (standardized path coefficient of direct effect = 0.11,  
455 Figs. 4B and 5) as NPP on S (standardized path coefficient of direct effect = 0.24; Figs. 4E and 5) and

43

456 weak indirect effects of NPP on S via biomass (standardized path coefficient of indirect effect = 0.04; Fig.  
457 4B). Similarly at the coarse spatial grain, we found strong direct effects of S on NPP (0.42, Fig. 4C and 5)  
458 and of NPP on S (0.47, Fig. 4F and 5) and weak indirect effects of NPP on S via biomass (standardized  
459 path coefficient of indirect effect = 0.08; Fig. 4C).

460 Overall, the SEMs suggest that the productivity-diversity relationship increases in strength with spatial  
461 grain, and both relationships (S → NPP and NPP → S) explain similar amounts of variation. At all spatial  
462 grains, our SEMs do not conclusively show stronger support for one direction of causality over the other.  
463 Similar patterns were observed when using plot-derived estimates of NPP (Fig. S9; Table S2), except for  
464 the direction of direct effects of S on NPP and NPP on S, which was negative.

465 **Random forest models (RFs).** To assess the relative importance of each predictor of species richness and  
466 NPP, and to provide an assumption-free alternative to the SEMs that also accounts for spatial  
467 autocorrelation, we fitted two random forest models for each of the three spatial grains: one with NPP and  
468 the other with S as response variables. We found that species richness was one of the weakest predictors  
469 of NPP relative to other predictors at all spatial grains (Fig. 6A), with management, forest age, MAP, and  
470 biomass being the most important predictors (Fig. 6A). The overall explained variation of NPP also  
471 increased from the fine to the two coarser spatial grains, from 0.64 at the fine spatial, to 0.89 at the  
472 intermediate spatial grain and 0.88 at the coarse spatial grain.

473 We found that NPP was an important predictor of S (with a positive effect) only at the intermediate  
474 spatial grain (Fig. 6B), but was less important relative to other predictors at fine and coarse spatial grains.  
475 For S, we found that species pool, mean annual temperature and precipitation, and forest age were the  
476 best predictors, and their importance increased towards coarse spatial grains (Fig. 6). In line with the  
477 SEM analyses, the overall explained variation of S increased towards coarse spatial grains, from 0.39 at  
478 the fine grain to 0.55 at the intermediate and 0.87 at coarse grains (see Fig. S10 for predicted vs. observed  
479 values).

45

480 In all RF analyses, there is a clear East-West spatial component in both S and NPP (represented by the X  
 481 coordinate in Fig. 6), which was not explained by any of the other predictors. This spatial component was  
 482 stronger for NPP than for S. Residual autocorrelation in all of the RF models was negligible (Fig S11).  
 483 Finally, we also fitted all of the RFs with local plot-derived measures of productivity (as an alternative to  
 484 the MODIS-derived productivity used in the main analyses), showing that the strength of the S-NPP  
 485 relationships were similar across all NPP measures (Fig. S12).

486

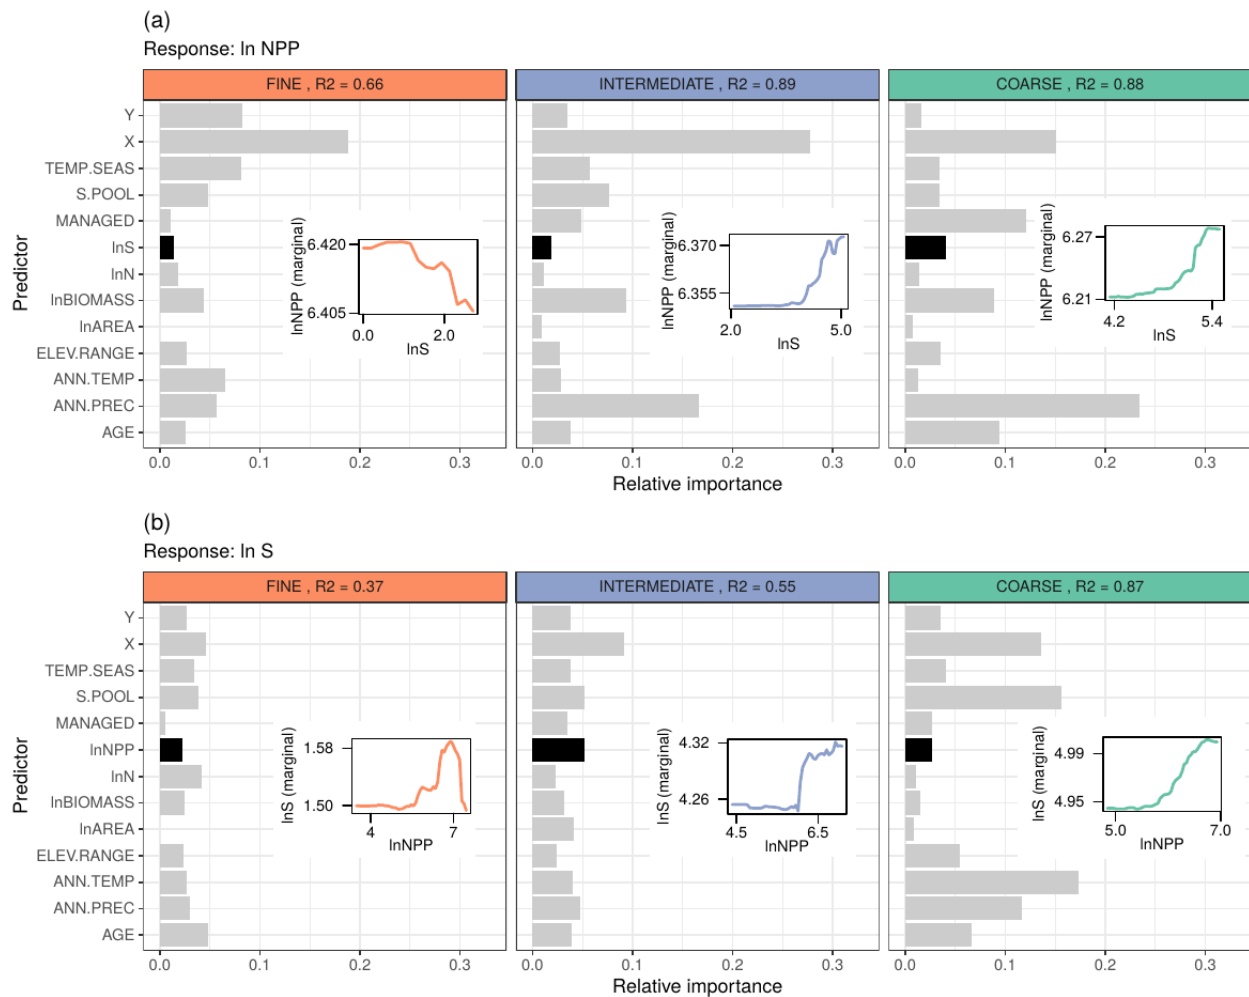

487 **Fig. 6.** Relative variable importance from random forest models explaining (a) MODIS-derived NPP and  
 488 (b) species richness (S) at three spatial grains. Relative variable importance is the mean decrease in  
 489 squared error caused by each of the variables, rescaled such that it sums up to the total pseudo R<sup>2</sup> of the  
 490 whole random forest model. The curves in the insets show shapes of the marginal responses of ln NPP or  
 491 ln S after accounting for all of the covariates. Y and X are latitudinal and longitudinal coordinates of the  
 492 US National Atlas projection, TEMP.SEAS is temperature seasonality, S.POOL is the regional species  
 493 pool, MANAGED is forest management, lnNPP is MODIS-derived NPP, lnN is the number of  
 494



47

495 individuals, lnBIOMASS is biomass, lnAREA is area of the spatial unit, ELEV.RANGE is elevation  
496 range, ANN.TEMP is mean annual temperature, ANN.PREC is mean annual precipitation, and AGE is  
497 forest age. For explanation of variables see Table S1.

498

## 499 **Discussion**

500 The first important result is the similar magnitude of the  $S \rightarrow NPP$  (Grace *et al.*, 2016) and  $NPP \rightarrow S$   
501 (Mittelbach *et al.*, 2001; Hawkins *et al.*, 2003; Šímová *et al.*, 2011) relationships at all grains. This  
502 reflects, in part, that both productivity and species richness have many environmental and geographical  
503 drivers in common (Lavers & Field, 2006), which complicates distinguishing correlation from causation,  
504 even when using SEMs (Grace *et al.*, 2010; Shipley, 2016). There are two possible interpretations of this  
505 result: (i) it may indicate that diversity's causal effects on productivity and productivity's causal effects  
506 on diversity operate simultaneously, which was suggested by (Grace *et al.*, 2016), but never demonstrated  
507 on observational data from large spatial grains. Alternatively (ii), if only one direction of the diversity-  
508 productivity relationship is real and causal, it may be possible to fit another model assuming the opposite  
509 direction because of multicollinearity in the data or non-identifiability of the causal direction (Petersen &  
510 van der Laan, 2014). Without large-grain experiments that manipulate diversity in ways that mimic  
511 biodiversity change (i.e. species gains and losses) in real-world ecosystems (Loreau *et al.*, 2001; Wardle,  
512 2016; Hillebrand *et al.*, 2018; Manning *et al.*, 2019; Gonzalez *et al.*, 2020), we see little hope for  
513 resolving this with contemporary data and approaches.

514 Our second important result is that both  $S \rightarrow NPP$  and  $NPP \rightarrow S$  strengthen from the fine to the intermediate  
515 grain, and in the case of the SEM both relationships continue strengthening towards the coarsest grain.

516 While grain-dependent shifts are often expected (Table 1), this had not been shown previously with  
517 empirical data for  $S \rightarrow NPP$  using spatial grains coarser than several hectares (Luo *et al.*; Chisholm *et al.*,  
518 2013; Hao *et al.*, 2018). If the  $S \rightarrow NPP$  direction is the real causal one, then our results from SEM and RF  
519 analyses support several theoretical expectations (Table 1) and give further impetus to efforts quantifying  
520 biodiversity effects in naturally assembled ecosystems at broad spatial scales (Isbell *et al.*, 2018). If the



521 NPP → S direction is the real causal one, then our results are in line with (Lavers & Field, 2006; Field *et*  
522 *al.*, 2009), but are in contrast with (Storch *et al.*, 2005; Belmaker & Jetz, 2011), particularly when  
523 upscaling from the fine grain to intermediate grain, where both the SEM and RF analyses give congruent  
524 results. Intriguingly, a third possibility is that both NPP → S and S → NPP are real and that they operate  
525 simultaneously, as suggested by our SEM results. In this case, we are unaware of any theory that  
526 considers how this reciprocal relationship would be expected to change with increasing spatial grain. The  
527 one caveat applicable to interpreting any direction of diversity-productivity relationships is that of  
528 demographic stochasticity (mechanism I in Table1), which may weaken both NPP → S and S → NPP, or  
529 their synergistic interplay, at fine spatial grains. In our study, the strong local effect of demographic  
530 stochasticity appears plausible given the small area of the forest plots (672 m<sup>2</sup>) and small population sizes  
531 (12.24 ± 0.02 trees per plot; range = 1- 157 trees per plot) therein. This would suggest that temporal  
532 changes in local scale biodiversity (Dornelas *et al.*, 2014; Magurran *et al.*, 2018) may have under-  
533 appreciated effects on ecosystem function (Bannar-Martin *et al.*, 2018).

534 The third key result is that other predictors, such as temperature and biomass, were particularly influential  
535 in all our analyses. That is, the grain dependence of the relationship between S and NPP was coupled with  
536 a clear increase in the combined effect of annual temperature and precipitation on both S and NPP  
537 towards coarse grains, which supports the notion that either temperature-dependent diversification  
538 (Rohde, 1992; Allen *et al.*, 2002), niche conservatism (Qian & Ricklefs, 2016), or ecological limits  
539 (Šímová *et al.*, 2011) shape diversity at these spatial grains. The weaker (relatively to temperature) effect  
540 of precipitation is expected since we focus on forests, which only grow above certain precipitation  
541 thresholds (Whittaker, 1975). The clear importance of temperature, biomass, longitude, and other  
542 predictors such as forest age, temperature seasonality, or species pool (Figs. 4 & 6) highlights that even  
543 when the NPP → S relationship holds across grains, other drivers are considerably more important in  
544 predicting both (e.g., Ratcliffe *et al.*, 2017). Hence, integrating the environmental context surrounding  
545 ecological communities into modeling diversity-productivity relationships is a necessary step towards

51

546 making robust predictions of either biodiversity or ecosystem functioning at any spatial grain.

547 Our results reveal that mechanisms associated with one direction of diversity-productivity relationships  
548 may provide insight to observed patterns of either direction, despite being initially formulated at a  
549 different spatial grain. For example, the strong effect of the East-West spatial coordinate on both S and  
550 NPP at the fine spatial grain (Fig. 6) suggests that biogeographical history may play a role in shaping the  
551 diversity and ecosystem functioning of plant communities, which was initially tested at larger spatial  
552 grains (e.g., Hawkins *et al.*, 2011; Conradi *et al.*, 2020). Increasingly, macroecological mechanisms such  
553 as speciation gradients (Schluter & Pennell, 2017) and water-energy variables are being examined in  
554 small-grain experimental grasslands to explore their role in mediating niche-based processes (Zuppinge-  
555 Dingley *et al.*, 2014) and biodiversity effects (Wagg *et al.*, 2017), respectively. Similarly, efforts to  
556 upscale biodiversity effects on productivity - developed initially to identify local scale mechanisms  
557 (Loreau & Hector, 2001; Turnbull *et al.*, 2016) - may identify new mechanisms that underpin spatial  
558 variation in ecosystem functioning at large spatial scales (Gonzalez *et al.*, 2020). An emerging challenge  
559 to these efforts is the creation of data products that capture similar processes across spatial scales and are  
560 independent (Supplemental Note 2 and Table S3); many of the variables used in this study share similar  
561 data sources (e.g. MODIS and LANDSAT sensors), but are ultimately derived from different types of  
562 intermediate products. Rather than uniquely focusing on the direction and strength of S-NPP once  
563 accounting for other factors, our results show that mechanisms associated with  $S \rightarrow NPP$  and  $NPP \rightarrow S$   
564 likely underpin the context dependency of diversity-productivity relationships across spatial grains (Table  
565 1). These recent developments in BEF research and macroecology suggest that conceptual integration  
566 between these two disciplines is just beginning (Craven *et al.*, 2019), yet further efforts to bridge  
567 disciplinary gaps are essential to deepen current understanding of mechanisms that underpin the shifts in  
568 diversity-productivity relationships across spatial scales.

569 To conclude, we show that the relationship between diversity and productivity strengthens toward coarse  
570 grains. This result is in line with expectations from both BEF theory, and some (but not all) expectations

53

571 from macroecological studies on NPP → S, and highlights the potential of demographic stochasticity and  
572 sampling effects to distort or mask diversity-productivity relationships at fine grains. Moreover, we find  
573 similar support for both directions of diversity-productivity relationships across spatial grains, revealing  
574 that biodiversity and productivity can be both cause and effect. Future research on this relationship needs  
575 to move from fine-grain experiments and observational studies to coarse grains in order to fully  
576 understand and predict the impacts of anthropogenic biodiversity change on ecosystem function.

## 577 **References**

- 578 Abrams, P.A. (1988) Resource Productivity-Consumer Species Diversity: Simple Models of Competition  
579 in Spatially Heterogeneous Environments. *Ecology*, **69**, 1418–1433.
- 580 Adler, P.B., Seabloom, E.W., Borer, E.T., Hillebrand, H., Hautier, Y., Hector, A., Harpole, W.S.,  
581 O’Halloran, L.R., Grace, J.B., Anderson, T.M., Bakker, J.D., Biederman, L.A., Brown, C.S.,  
582 Buckley, Y.M., Calabrese, L.B., Chu, C.-J., Cleland, E.E., Collins, S.L., Cottingham, K.L.,  
583 Crawley, M.J., Damschen, E.I., Davies, K.F., DeCrappeo, N.M., Fay, P.A., Firn, J., Frater, P.,  
584 Gasarch, E.I., Gruner, D.S., Hagenah, N., Hille Ris Lambers, J., Humphries, H., Jin, V.L., Kay,  
585 A.D., Kirkman, K.P., Klein, J.A., Knops, J.M.H., La Pierre, K.J., Lambrinos, J.G., Li, W.,  
586 MacDougall, A.S., McCulley, R.L., Melbourne, B.A., Mitchell, C.E., Moore, J.L., Morgan, J.W.,  
587 Mortensen, B., Orrock, J.L., Prober, S.M., Pyke, D.A., Risch, A.C., Schuetz, M., Smith, M.D.,  
588 Stevens, C.J., Sullivan, L.L., Wang, G., Wragg, P.D., Wright, J.P. & Yang, L.H. (2011)  
589 Productivity Is a Poor Predictor of Plant Species Richness. *Science*, **333**, 1750–1753.
- 590 Allen, A.P., Brown, J.H. & Gillooly, J.F. (2002) Global Biodiversity, Biochemical Kinetics, and the  
591 Energetic-Equivalence Rule. *Science*, **297**, 1545–1548.
- 592 Balvanera, P., Pfisterer, A.B., Buchmann, N., He, J.-S., Nakashizuka, T., Raffaelli, D. & Schmid, B.  
593 (2006) Quantifying the evidence for biodiversity effects on ecosystem functioning and services.  
594 *Ecology Letters*, **9**, 1146–1156.
- 595 Bannar-Martin, K.H., Kremer, C.T., Ernest, S.K.M., Leibold, M.A., Auge, H., Chase, J., Declerck, S.A.J.,

55

- 596 Eisenhauer, N., Harpole, S., Hillebrand, H., Isbell, F., Koffel, T., Larsen, S., Narwani, A.,  
597 Petermann, J.S., Roscher, C., Cabral, J.S. & Supp, S.R. (2018) Integrating community assembly  
598 and biodiversity to better understand ecosystem function: the Community Assembly and the  
599 Functioning of Ecosystems (CAFE) approach. *Ecology Letters*, **21**, 167–180.
- 600 Belmaker, J. & Jetz, W. (2011) Cross-scale variation in species richness–environment associations.  
601 *Global Ecology and Biogeography*, **20**, 464–474.
- 602 Blackard, J.A., Finco, M.V., Helmer, E.H., Holden, G.R., Hoppus, M.L., Jacobs, D.M., Lister, A.J.,  
603 Moisen, G.G., Nelson, M.D., Riemann, R., Ruefenacht, B., Salajanu, D., Weyermann, D.L.,  
604 Winterberger, K.C., Brandeis, T.J., Czaplewski, R.L., McRoberts, R.E., Patterson, P.L. &  
605 Tymcio, R.P. (2008) Mapping U.S. forest biomass using nationwide forest inventory data and  
606 moderate resolution information. *Remote Sensing of Environment*, **112**, 1658–1677.
- 607 Breiman, L. (2001) Random forests. *Machine learning*, **45**, 5–32.
- 608 Burrill, E.A., Wilson, A.M., Turner, J.A., Pugh, S.A., Menlove, J., Christiansen, G., Conkling, B.L. &  
609 David, W. (2018) *The Forest Inventory and Analysis Database: database description and user  
610 guide version 8.0 for Phase 2*, U.S. Department of Agriculture, Forest Service.
- 611 Cadotte, M.W. (2015) Phylogenetic diversity and productivity: gauging interpretations from experiments  
612 that do not manipulate phylogenetic diversity. *Functional Ecology*, **29**, 1603–1606.
- 613 Cardinale, B.J., Duffy, J.E., Gonzalez, A., Hooper, D.U., Perrings, C., Venail, P., Narwani, A., Mace,  
614 G.M., Tilman, D., Wardle, D.A., Kinzig, A.P., Daily, G.C., Loreau, M., Grace, J.B., Larigauderie,  
615 A., Srivastava, D.S. & Naeem, S. (2012) Biodiversity loss and its impact on humanity. *Nature*,  
616 **486**, 59–67.
- 617 Cardinale, B.J., Hillebrand, H., Harpole, W., Gross, K. & Ptacnik, R. (2009) Separating the influence of  
618 resource ‘availability’ from resource ‘imbalance’ on productivity–diversity relationships. *Ecology  
619 Letters*, **12**, 475–487.
- 620 Cardinale, B.J., Ives, A.R. & Inchausti, P. (2004) Effects of species diversity on the primary productivity  
621 of ecosystems: extending our spatial and temporal scales of inference. *Oikos*, **104**, 437–450.

57

- 622 Cardinale, B.J., Matulich, K.L., Hooper, D.U., Byrnes, J.E., Duffy, E., Gamfeldt, L., Balvanera, P.,  
623 Connor, M.I.O.' & Gonzalez, A. (2011) The functional role of producer diversity in ecosystems.  
624 *American Journal of Botany*, **98**, 1–21.
- 625 Chalcraft, D.R. (2013) Changes in ecological stability across realistic biodiversity gradients depend on  
626 spatial scale. *Global Ecology and Biogeography*, **22**, 19–28.
- 627 Chase, J.M. & Leibold, M.A. (2002) Spatial scale dictates the productivity–biodiversity relationship.  
628 *Nature*, **416**, 427–430.
- 629 Chen, H.Y.H. & Luo, Y. (2015) Net aboveground biomass declines of four major forest types with forest  
630 ageing and climate change in western Canada’s boreal forests. *Global Change Biology*, **21**, 3675–  
631 3684.
- 632 Chisholm, R.A., Muller Landau, H.C., Rahman, K.A., Bebbler, D.P., Bin, Y., Bohlman, S.A., Bourg,  
633 N.A., Brinks, J., Bunyavejchewin, S., Butt, N., Cao, H., Cao, M., Cárdenas, D., Chang, L.-W.,  
634 Chiang, J.-M., Chuyong, G., Condit, R., Dattaraja, H.S., Davies, S., Duque, A., Fletcher, C.,  
635 Gunatilleke, N., Gunatilleke, S., Hao, Z., Harrison, R.D., Howe, R., Hsieh, C.-F., Hubbell, S.P.,  
636 Itoh, A., Kenfack, D., Kiratiprayoon, S., Larson, A.J., Lian, J., Lin, D., Liu, H., Lutz, J.A., Ma,  
637 K., Malhi, Y., McMahon, S., McShea, W., Meegaskumbura, M., Razman, S.M., Morecroft, M.D.,  
638 Nytch, C.J., Oliveira, A., Parker, G.G., Pulla, S., PUNCHI Manage, R., Romero Saltos, H., Sang,  
639 W., Schurman, J., Su, S.-H., Sukumar, R., Sun, I.-F., Suresh, H.S., Tan, S., Thomas, D., Thomas,  
640 S., Thompson, J., Valencia, R., Wolf, A., Yap, S., Ye, W., Yuan, Z. & Zimmerman, J.K. (2013)  
641 Scale-dependent relationships between tree species richness and ecosystem function in forests.  
642 *Journal of Ecology*, **101**, 1214–1224.
- 643 Cochran, W.G. (1977) *Sampling techniques*, 3rd edn. John Wiley and Sons, New York, USA.
- 644 Connell, J.H. & Orias, E. (1964) The Ecological Regulation of Species Diversity. *The American*  
645 *Naturalist*, **98**, 399–414.
- 646 Conradi, T., Meerbeek, K.V., Ordonez, A. & Svenning, J.-C. (2020) Biogeographic historical legacies in  
647 the net primary productivity of Northern Hemisphere forests. *Ecology Letters*, **23**, 800–810.

58 Craven et al. 29

- 648 Craven, D., Winter, M., Hotzel, K., Gaikwad, J., Eisenhauer, N., Hohmuth, M., König Ries, B. & Wirth,  
649 C. (2019) Evolution of interdisciplinarity in biodiversity science. *Ecology and Evolution*, **9**,  
650 6744–6755.
- 651 Crowther, T., Glick, H., Covey, K., Bettigole, C., Maynard, D., Thomas, S., Smith, J., Hintler, G.,  
652 Duguid, M., Amatulli, G. & others (2015) Global tree density map.
- 653 Currie, D.J. (1991) Energy and large-scale patterns of animal-and plant-species richness. *The American*  
654 *Naturalist*, **137**, 27–49.
- 655 Dormann, C.F., McPherson, J.M., Araújo, M.B., Bivand, R., Bolliger, J., Carl, G., Davies, R.G., Hirzel,  
656 A., Jetz, W., Kissling, W.D., Kühn, I., Ohlemüller, R., Peres Neto, P.R., Reineking, B.,  
657 Schröder, B., Schurr, F.M. & Wilson, R. (2007) Methods to account for spatial autocorrelation in  
658 the analysis of species distributional data: a review. *Ecography*, **30**, 609–628.
- 659 Dornelas, M., Gotelli, N.J., McGill, B., Shimadzu, H., Moyes, F., Sievers, C. & Magurran, A.E. (2014)  
660 Assemblage Time Series Reveal Biodiversity Change but Not Systematic Loss. *Science*, **344**,  
661 296–299.
- 662 Duffy, J.E., Godwin, C.M. & Cardinale, B.J. (2017) Biodiversity effects in the wild are common and as  
663 strong as key drivers of productivity. *Nature*, **549**, 261–264.
- 664 Field, R., Hawkins, B.A., Cornell, H.V., Currie, D.J., Diniz Filho, J.A.F., Guégan, J.-F., Kaufman, D.M.,  
665 Kerr, J.T., Mittelbach, G.G., Oberdorff, T., O'Brien, E.M. & Turner, J.R.G. (2009) Spatial  
666 species-richness gradients across scales: a meta-analysis. *Journal of Biogeography*, **36**, 132–147.
- 667 Fraser, L.H., Pither, J., Jentsch, A., Sternberg, M., Zobel, M., Askarizadeh, D., Bartha, S., Beierkuhnlein,  
668 C., Bennett, J.A., Bittel, A., Boldgiv, B., Boldrini, I.I., Bork, E., Brown, L., Cabido, M., Cahill,  
669 J., Carlyle, C.N., Campetella, G., Chelli, S., Cohen, O., Csergo, A.-M., Díaz, S., Enrico, L.,  
670 Ensing, D., Fidelis, A., Fridley, J.D., Foster, B., Garris, H., Goheen, J.R., Henry, H.A.L., Hohn,  
671 M., Jouri, M.H., Klironomos, J., Koorem, K., Lawrence-Lodge, R., Long, R., Manning, P.,  
672 Mitchell, R., Moora, M., Müller, S.C., Nabinger, C., Naseri, K., Overbeck, G.E., Palmer, T.M.,  
673 Parsons, S., Pesek, M., Pillar, V.D., Pringle, R.M., Roccaforte, K., Schmidt, A., Shang, Z.,

61

- 674 Stahlmann, R., Stotz, G.C., Sugiyama, S., Szentes, S., Thompson, D., Tungalag, R.,  
675 Undrakhbold, S., van Rooyen, M., Wellstein, C., Wilson, J.B. & Zupo, T. (2015) Worldwide  
676 evidence of a unimodal relationship between productivity and plant species richness. *Science*,  
677 **349**, 302–305.
- 678 Gonzalez, A., Germain, R.M., Srivastava, D.S., Filotas, E., Dee, L.E., Gravel, D., Thompson, P.L., Isbell,  
679 F., Wang, S., Kéfi, S., Montoya, J., Zelnik, Y.R. & Loreau, M. (2020) Scaling-up biodiversity-  
680 ecosystem functioning research. *Ecology Letters*, **23**, 757-776.
- 681 Grace, J.B., Anderson, T.M., Olff, H. & Scheiner, S.M. (2010) On the specification of structural equation  
682 models for ecological systems. *Ecological Monographs*, **80**, 67–87.
- 683 Grace, J.B., Anderson, T.M., Seabloom, E.W., Borer, E.T., Adler, P.B., Harpole, W.S., Hautier, Y.,  
684 Hillebrand, H., Lind, E.M., Pärtel, M., Bakker, J.D., Buckley, Y.M., Crawley, M.J., Damschen,  
685 E.I., Davies, K.F., Fay, P.A., Firn, J., Gruner, D.S., Hector, A., Knops, J.M.H., MacDougall,  
686 A.S., Melbourne, B.A., Morgan, J.W., Orrock, J.L., Prober, S.M. & Smith, M.D. (2016)  
687 Integrative modelling reveals mechanisms linking productivity and plant species richness.  
688 *Nature*, **529**, 390–393.
- 689 Hao, M., Zhang, C., Zhao, X. & Gadow, K. von (2018) Functional and phylogenetic diversity determine  
690 woody productivity in a temperate forest. *Ecology and Evolution*, **8**, 2395–2406.
- 691 Hastie, T., Tibshirani, R. & Friedman, J.H. (2009) *The elements of statistical learning: data mining,*  
692 *inference, and prediction*, 2nd edn. New York, NY: Springer.
- 693 Hawkins, B.A., Field, R., Cornell, H.V., Currie, D.J., Guégan, J.-F., Kaufman, D.M., Kerr, J.T.,  
694 Mittelbach, G.G., Oberdorff, T., O’Brien, E.M., Porter, E.E. & Turner, J.R.G. (2003) Energy,  
695 water, and broad-scale geographic patterns of species richness. *Ecology*, **v. 84**, 3105–3117.
- 696 Hawkins, B.A., Rodríguez, M.Á. & Weller, S.G. (2011) Global angiosperm family richness revisited:  
697 linking ecology and evolution to climate. *Journal of Biogeography*, **38**, 1253–1266.
- 698 Hijmans, R.J., Cameron, S.E., Parra, J.L., Jones, P.G. & Jarvis, A. (2005) Very high resolution  
699 interpolated climate surfaces for global land areas. *International Journal of Climatology*, **25**,



63

- 700 1965–1978.
- 701 Hillebrand, H., Blasius, B., Borer, E.T., Chase, J.M., Downing, J.A., Eriksson, B.K., Filstrup, C.T.,  
702 Harpole, W.S., Hodapp, D., Larsen, S., Lewandowska, A.M., Seabloom, E.W., Van de Waal,  
703 D.B. & Ryabov, A.B. (2018) Biodiversity change is uncoupled from species richness trends:  
704 Consequences for conservation and monitoring. *Journal of Applied Ecology*, **55**, 169–184.
- 705 Hooper, D.U., Adair, E.C., Cardinale, B.J., Byrnes, J.E.K., Hungate, B.A., Matulich, K.L., Gonzalez, A.,  
706 Duffy, J.E., Gamfeldt, L. & O’Connor, M.I. (2012) A global synthesis reveals biodiversity loss  
707 as a major driver of ecosystem change. *Nature*, **486**, 105–108.
- 708 Isbell, F., Cowles, J., Dee, L.E., Loreau, M., Reich, P.B., Gonzalez, A., Hector, A. & Schmid, B. (2018)  
709 Quantifying effects of biodiversity on ecosystem functioning across times and places. *Ecology*  
710 *Letters*, **21**, 763–778.
- 711 Isbell, F., Gonzalez, A., Loreau, M., Cowles, J., Diaz, S., Hector, A., Mace, G.M., Wardle, D.A.,  
712 O’Connor, M.I., Duffy, J.E., Turnbull, L.A., Thompson, P.L. & Larigauderie, A. (2017) Linking  
713 the influence and dependence of people on biodiversity across scales. *Nature*, **546**, 65–72.
- 714 Jetz, W. & Fine, P.V.A. (2012) Global Gradients in Vertebrate Diversity Predicted by Historical Area-  
715 Productivity Dynamics and Contemporary Environment. *PLOS Biology*, **10**, e1001292.
- 716 Karger, D.N., Cord, A.F., Kessler, M., Kreft, H., Kühn, I., Pompe, S., Sandel, B., Sarmiento Cabral, J.,  
717 Smith, A.B., Svenning, J.-C., Tuomisto, H., Weigelt, P. & Wesche, K. (2016) Delineating  
718 probabilistic species pools in ecology and biogeography. *Global Ecology and Biogeography*, **25**,  
719 489–501.
- 720 Kartesz, J.T. (2015) The Biota of North America Program (BONAP). *Taxonomic Data Center*.
- 721 Kowarik, I. (2008) *On the Role of Alien Species in Urban Flora and Vegetation*. *Urban Ecology: An*  
722 *International Perspective on the Interaction Between Humans and Nature* (ed. by J.M. Marzluff),  
723 E. Shulenberg, W. Endlicher, M. Alberti, G. Bradley, C. Ryan, U. Simon, and C.  
724 ZumBrunnen), pp. 321–338. Springer US, Boston, MA.
- 725 Lande, R., Engen, S. & Saether, B.-E. (2003) *Stochastic population dynamics in ecology and*



65

- 726 *conservation*, Oxford University Press.
- 727 Lavers, C. & Field, R. (2006) A resource-based conceptual model of plant diversity that reassesses  
728 causality in the productivity–diversity relationship. *Global Ecology and Biogeography*, **15**, 213–  
729 224.
- 730 Liang, J., Crowther, T.W., Picard, N., Wiser, S., Zhou, M., Alberti, G., Schulze, E.-D., McGuire, A.D.,  
731 Bozzato, F., Pretzsch, H., de-Miguel, S., Paquette, A., Hérault, B., Scherer-Lorenzen, M., Barrett,  
732 C.B., Glick, H.B., Hengeveld, G.M., Nabuurs, G.-J., Pfautsch, S., Viana, H., Vibrans, A.C.,  
733 Ammer, C., Schall, P., Verbyla, D., Tchebakova, N., Fischer, M., Watson, J.V., Chen, H.Y.H.,  
734 Lei, X., Schelhaas, M.-J., Lu, H., Gianelle, D., Parfenova, E.I., Salas, C., Lee, E., Lee, B., Kim,  
735 H.S., Bruelheide, H., Coomes, D.A., Piotta, D., Sunderland, T., Schmid, B., Gourlet-Fleury, S.,  
736 Sonké, B., Tavana, R., Zhu, J., Brandl, S., Vayreda, J., Kitahara, F., Searle, E.B., Neldner, V.J.,  
737 Ngugi, M.R., Baraloto, C., Frizzera, L., Bałazy, R., Oleksyn, J., Zawila-Niedzwiecki, T.,  
738 Bouriaud, O., Bussotti, F., Finér, L., Jaroszewicz, B., Jucker, T., Valladares, F., Jagodzinski,  
739 A.M., Peri, P.L., Gonmadje, C., Marthy, W., O’Brien, T., Martin, E.H., Marshall, A.R., Rovero,  
740 F., Bitariho, R., Niklaus, P.A., Alvarez-Loayza, P., Chamuya, N., Valencia, R., Mortier, F.,  
741 Wortel, V., Engone-Obiang, N.L., Ferreira, L.V., Odeke, D.E., Vasquez, R.M., Lewis, S.L. &  
742 Reich, P.B. (2016) Positive biodiversity-productivity relationship predominant in global forests.  
743 *Science*, **354**, aaf8957.
- 744 Liaw, A. & Wiener, M. (2002) Classification and regression by randomForest. *R news*, **2**, 18–22.
- 745 Loreau, M. & Hector, A. (2001) Partitioning selection and complementarity in biodiversity experiments.  
746 *Nature*, **412**, 72–76.
- 747 Loreau, M., Mouquet, N. & Gonzalez, A. (2003) Biodiversity as spatial insurance in heterogeneous  
748 landscapes. *Proceedings of the National Academy of Sciences*, **100**, 12765–12770.
- 749 Loreau, M., Naeem, S., Inchausti, P., Bengtsson, J., Grime, J.P., Hector, A., Hooper, D.U., Huston, M.A.,  
750 Raffaelli, D., Schmid, B., Tilman, D. & Wardle, D.A. (2001) Biodiversity and Ecosystem  
751 Functioning: Current Knowledge and Future Challenges. *Science*, **294**, 804–808.

67

- 752 Luo, W., Liang, J., Gatti, R.C., Zhao, X. & Zhang, C. Parameterization of biodiversity–productivity  
753 relationship and its scale dependency using georeferenced tree-level data. *Journal of Ecology*, **0**.
- 754 Magurran, A.E., Deacon, A.E., Moyes, F., Shimadzu, H., Dornelas, M., Phillip, D.A.T. & Ramnarine,  
755 I.W. (2018) Divergent biodiversity change within ecosystems. *Proceedings of the National*  
756 *Academy of Sciences*, 201712594.
- 757 Manning, P., Loos, J., Barnes, A.D., Batáry, P., Bianchi, F.J.J.A., Buchmann, N., De Deyn, G.B.,  
758 Ebeling, A., Eisenhauer, N., Fischer, M., Fründ, J., Grass, I., Isselstein, J., Jochum, M., Klein,  
759 A.M., Klingenberg, E.O.F., Landis, D.A., Lepš, J., Lindborg, R., Meyer, S.T., Temperton, V.M.,  
760 Westphal, C. & Tschardtke, T. (2019) Transferring biodiversity-ecosystem function research to  
761 the management of ‘real-world’ ecosystems. *Advances in Ecological Research* (ed. by N.  
762 Eisenhauer, D.A. Bohan, and A.J. Dumbrell), pp. 323–356. Academic Press.
- 763 Meyer, C., Weigelt, P. & Kreft, H. (2016) Multidimensional biases, gaps and uncertainties in global plant  
764 occurrence information. *Ecology Letters*, **19**, 992–1006.
- 765 Mittelbach, G.G., Steiner, C.F., Scheiner, S.M., Gross, K.L., Reynolds, H.L., Waide, R.B., Willig, M.R.,  
766 Dodson, S.I. & Gough, L. (2001) What Is the Observed Relationship Between Species Richness  
767 and Productivity? *Ecology*, **82**, 2381–2396.
- 768 Naeem, S., Duffy, J.E. & Zavaleta, E. (2012) The Functions of Biological Diversity in an Age of  
769 Extinction. *Science*, **336**, 1401–1406.
- 770 Oberle, B., Grace, J.B. & Chase, J.M. (2009) Beneath the veil: plant growth form influences the strength  
771 of species richness–productivity relationships in forests. *Global Ecology and Biogeography*, **18**,  
772 416–425.
- 773 Pan, Y., Chen, J.M., Birdsey, R., McCullough, K., He, L. & Deng, F. (2012) *NACP Forest Age Maps at*  
774 *1-km Resolution for Canada (2004) and the U.S.A. (2006)*. Data set., ORNL DAAC, Oak Ridge,  
775 Tennessee, USA.
- 776 Paquette, A. & Messier, C. (2011) The effect of biodiversity on tree productivity: from temperate to  
777 boreal forests. *Global Ecology and Biogeography*, **20**, 170–180.

- 778 Pearse, W.D., Cavender-Bares, J., Hobbie, S.E., Avolio, M.L., Bettez, N., Roy Chowdhury, R., Darling,  
779 L.E., Groffman, P.M., Grove, J.M., Hall, S.J., Heffernan, J.B., Learned, J., Neill, C., Nelson,  
780 K.C., Pataki, D.E., Ruddell, B.L., Steele, M.K. & Trammell, T.L.E. (2018) Homogenization of  
781 plant diversity, composition, and structure in North American urban yards. *Ecosphere*, **9**, e02105.
- 782 Petersen, M.L. & van der Laan, M.J. (2014) Causal models and learning from data: integrating causal  
783 modeling and statistical estimation. *Epidemiology (Cambridge, Mass.)*, **25**, 418–426.
- 784 van der Plas, F. (2019) Biodiversity and ecosystem functioning in naturally assembled communities.  
785 *Biological Reviews*, **94**, 1220–1245.
- 786 Qian, H. & Ricklefs, R.E. (2016) Out of the tropical lowlands: latitude versus elevation. *Trends in*  
787 *ecology & evolution*, **31**, 738–741.
- 788 Ratcliffe, S., Wirth, C., Jucker, T., van der Plas, F., Scherer-Lorenzen, M., Verheyen, K., Allan, E.,  
789 Benavides, R., Bruelheide, H., Ohse, B., Paquette, A., Ampoorter, E., Bastias, C.C., Bauhus, J.,  
790 Bonal, D., Bouriaud, O., Bussotti, F., Carnol, M., Castagneyrol, B., Čečko, E., Dawud, S.M.,  
791 Wandeler, H.D., Domisch, T., Finér, L., Fischer, M., Fotelli, M., Gessler, A., Granier, A.,  
792 Grossiord, C., Guyot, V., Haase, J., Hättenschwiler, S., Jactel, H., Jaroszewicz, B., Joly, F.-X.,  
793 Kambach, S., Kolb, S., Koricheva, J., Liebersgesell, M., Milligan, H., Müller, S., Muys, B.,  
794 Nguyen, D., Nock, C., Pollastrini, M., Purschke, O., Radoglou, K., Raulund-Rasmussen, K.,  
795 Roger, F., Ruiz-Benito, P., Seidl, R., Selvi, F., Seiferling, I., Stenlid, J., Valladares, F., Vesterdal,  
796 L. & Baeten, L. (2017) Biodiversity and ecosystem functioning relations in European forests  
797 depend on environmental context. *Ecology Letters*, **20**, 1414–1426.
- 798 Rohde, K. (1992) Latitudinal Gradients in Species Diversity: The Search for the Primary Cause. *Oikos*,  
799 **65**, 514–527.
- 800 Rosenzweig, M.L. (1995) *Species diversity in space and time*, Cambridge University Press.
- 801 Rosseel, Y. (2012) lavaan: An R Package for Structural Equation Modeling. *Journal of Statistical*  
802 *Software*, **48**, 1–36.
- 803 Schluter, D. & Pennell, M.W. (2017) Speciation gradients and the distribution of biodiversity. *Nature*,

71

804 **546**, 48–55.

805 Schulze, E. & Mooney, H. (1993) *Biodiversity and Ecosystem Function*, Springer, Berlin.

806 Shipley, B. (2016) *Cause and Correlation in Biology: A User's Guide to Path Analysis, Structural*

807 *Equations and Causal Inference with R*, 2nd edn. Cambridge University Press.

808 Šímová, I., Storch, D., Keil, P., Boyle, B., Phillips, O.L. & Enquist, B.J. (2011) Global species–energy

809 relationship in forest plots: role of abundance, temperature and species climatic tolerances.

810 *Global Ecology and Biogeography*, **20**, 842–856.

811 Srivastava, D.S. & Vellend, M. (2005) Biodiversity-Ecosystem Function Research: Is It Relevant to

812 Conservation? *Annual Review of Ecology, Evolution, and Systematics*, **36**, 267–294.

813 Stein, A., Gerstner, K. & Kreft, H. (2014) Environmental heterogeneity as a universal driver of species

814 richness across taxa, biomes and spatial scales. *Ecology Letters*, **17**, 866–880.

815 Storch, D., Evans, K.L. & Gaston, K.J. (2005) The species–area–energy relationship. *Ecology Letters*, **8**,

816 487–492.

817 The Plant List (2013) Version 1.1 URL: <http://www.theplantlist.org/> [accessed 1 December 2017].

818 The Taxonomic Name Resolution Service iPlant Collaborative. (2018) Version 4.0.[Accessed September

819 2016]. Available from <http://tnrs.iplantcollaborative.org>.

820 Thomas, S.C. & Martin, A.R. (2012) Carbon Content of Tree Tissues: A Synthesis. *Forests*, **3**, 332–352.

821 Thompson, P.L., Isbell, F., Loreau, M., O'Connor, M.I. & Gonzalez, A. (2018) The strength of the

822 biodiversity–ecosystem function relationship depends on spatial scale. *Proceedings of the Royal*

823 *Society B: Biological Sciences*, **285**.

824 Tilman, D. (1999) The ecological consequences of changes in biodiversity: a search for general

825 principles. *Ecology*, **80**, 1455–1474.

826 Tilman, D., Isbell, F. & Cowles, J.M. (2014) Biodiversity and Ecosystem Functioning. *Annual Review of*

827 *Ecology, Evolution, and Systematics*, **45**, 471–493.

828 Turnbull, L.A., Isbell, F., Purves, D.W., Loreau, M. & Hector, A. (2016) Understanding the value of plant

829 diversity for ecosystem functioning through niche theory. *Proceedings of the Royal Society of*

73

- 830 *London B: Biological Sciences*, **283**.
- 831 USDA Forest Service (2017) *Forest Inventory and Analysis National Program (FIA) database v. 1.7.0*.
- 832 USDA NRCS (2018) The PLANTS Database (<http://plants.usda.gov>).
- 833 USGS (2009) SRTM v2.1 Topography.
- 834 Venail, P., Gross, K., Oakley, T.H., Narwani, A., Allan, E., Flombaum, P., Isbell, F., Joshi, J., Reich,  
835 P.B., Tilman, D., van Ruijven, J. & Cardinale, B.J. (2015) Species richness, but not phylogenetic  
836 diversity, influences community biomass production and temporal stability in a re-examination of  
837 16 grassland biodiversity studies. *Functional Ecology*, **29**, 615–626.
- 838 Wagg, C., O'Brien, M.J., Vogel, A., Scherer Lorenzen, M., Eisenhauer, N., Schmid, B. & Weigelt, A.  
839 (2017) Plant diversity maintains long-term ecosystem productivity under frequent drought by  
840 increasing short-term variation. *Ecology*, **98**, 2952–2961.
- 841 Waide, R.B., Willig, M.R., Steiner, C.F., Mittelbach, G., Gough, L., Dodson, S.I., Juday, G.P. &  
842 Parmenter, R. (1999) The Relationship Between Productivity and Species Richness. *Annual  
843 Review of Ecology and Systematics*, **30**, 257–300.
- 844 Wardle, D.A. (2016) Do experiments exploring plant diversity–ecosystem functioning relationships  
845 inform how biodiversity loss impacts natural ecosystems? *Journal of Vegetation Science*, n/a–n/a.
- 846 Warton, D.I., Duursma, R.A., Falster, D.S. & Taskinen, S. (2012) smatr 3 - an R package for estimation  
847 and inference about allometric lines. *Methods in Ecology and Evolution*, **3**, 257–259.
- 848 Whittaker, R. (1975) *Communities and Ecosystems*, 2nd edn. MacMillan, New York, USA.
- 849 Whittaker, R.J. (2010) Meta-analyses and mega-mistakes: calling time on meta-analysis of the species  
850 richness–productivity relationship. *Ecology*, **91**, 2522–2533.
- 851 Wright, D.H., Currie, D.J. & Maurer, B.A. (1993) Energy supply and patterns of species richness on local  
852 and regional scales. *Species diversity in ecological communities: historical and geographical  
853 perspectives*, 66–74.
- 854 Zanne, A., Tank, D., Cornwell, W., Eastman, J., Smith, S., FitzJohn, R., McGlenn, D., O'Meara, B.,  
855 Moles, A., Reich, P., Royer, D., Soltis, D., Stevens, P., Westoby, M., Wright, I., Aarssen, L.,

75

- 856 Bertin, R., Calaminus, A., Govaerts, R., Hemmings, F., Leishman, M., Oleksyn, J., Soltis, P.,  
857 Swenson, N., Warman, L., Beaulieu, J. & Ordonez, A. (2013) *Data from: Three keys to the*  
858 *radiation of angiosperms into freezing environments*, Dryad Digital Repository.
- 859 Zuppinger-Dingley, D., Schmid, B., Petermann, J.S., Yadav, V., De Deyn, G.B. & Flynn, D.F.B. (2014)  
860 Selection for niche differentiation in plant communities increases biodiversity effects. *Nature*,  
861 **515**, 108–111.
